# Supplementary figures and images for: Multicenter Phase II Study of Oxaliplatin, Irinotecan, and S-1 as First-line Treatment for Patients with Recurrent or Metastatic Biliary Tract Cancer
Source: PubMed Central journal article supplement — Cancer Res Treat. 2018 Jan 8;50(4):1324–30. doi: 10.4143/crt.2017.526 (PMC6192931; doi:10.4143/crt.2017.526), 2018-01-08

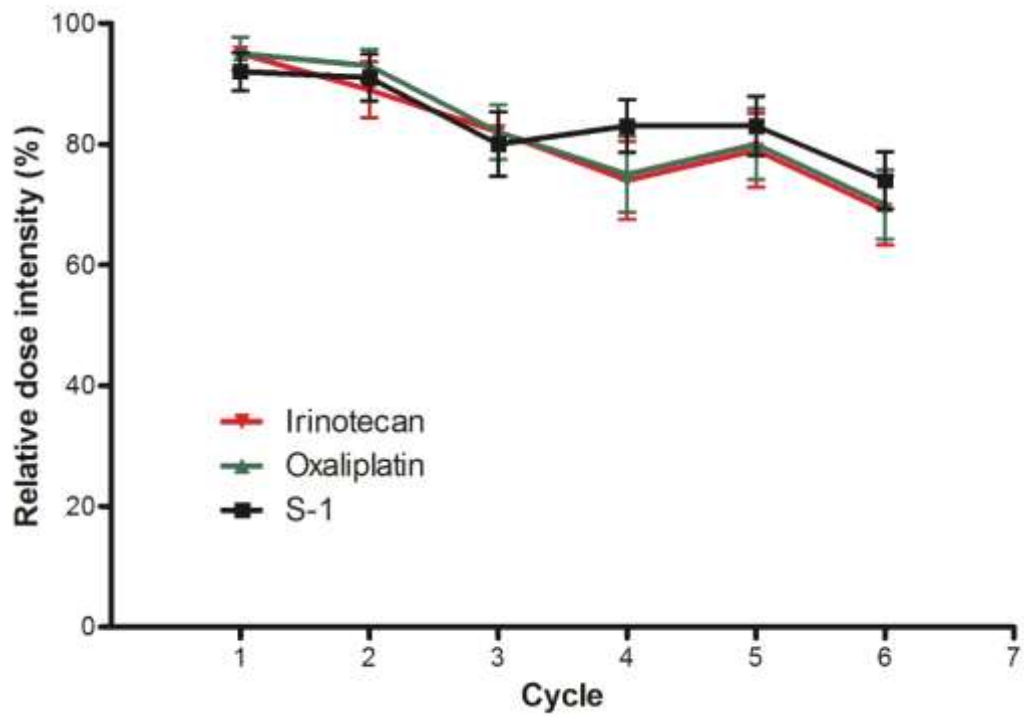

**S1 Fig.** Relative dose intensities of oxaliplatin, irinotecan, and S-1.

Supplement: crt-2017-526-suppl1.pdf [file crt-2017-526-suppl1.pdf]
